# Supplementary material
Source: publisher figshare collection journal article supplement (https://karger.figshare.com/ndownloader/files/14298104)
Supplement: Supplementary file 1 [file 14298104]

**miR-192 is Overexpressed and Promotes Cell Proliferation in Prostate Cancer**

Zhong-Jun Chena, You-Ji Yana, Hao Shenb, Jia-Jie Zhoua, Guang-Hua Yanga, Yi-Xiang Liaoa, Jin-Min Zenga, Tao Yanga

a Department of Urology, Jingzhou Central Hospital, The Second Clinical Medical College, Yangtze University, Jingzhou, Hubei; bDepartment of Urology, Renmin Hospital of Wuhan University, Wuhan, Hubei, China

**Address all Correspondence to:**

Shen Hao

Department of Urology

Renmin Hospital of Wuhan University

Wuhan, Hubei 430060

China

Email: [2009203020115@whu.edu.cn](mailto:2009203020115@whu.edu.cn)


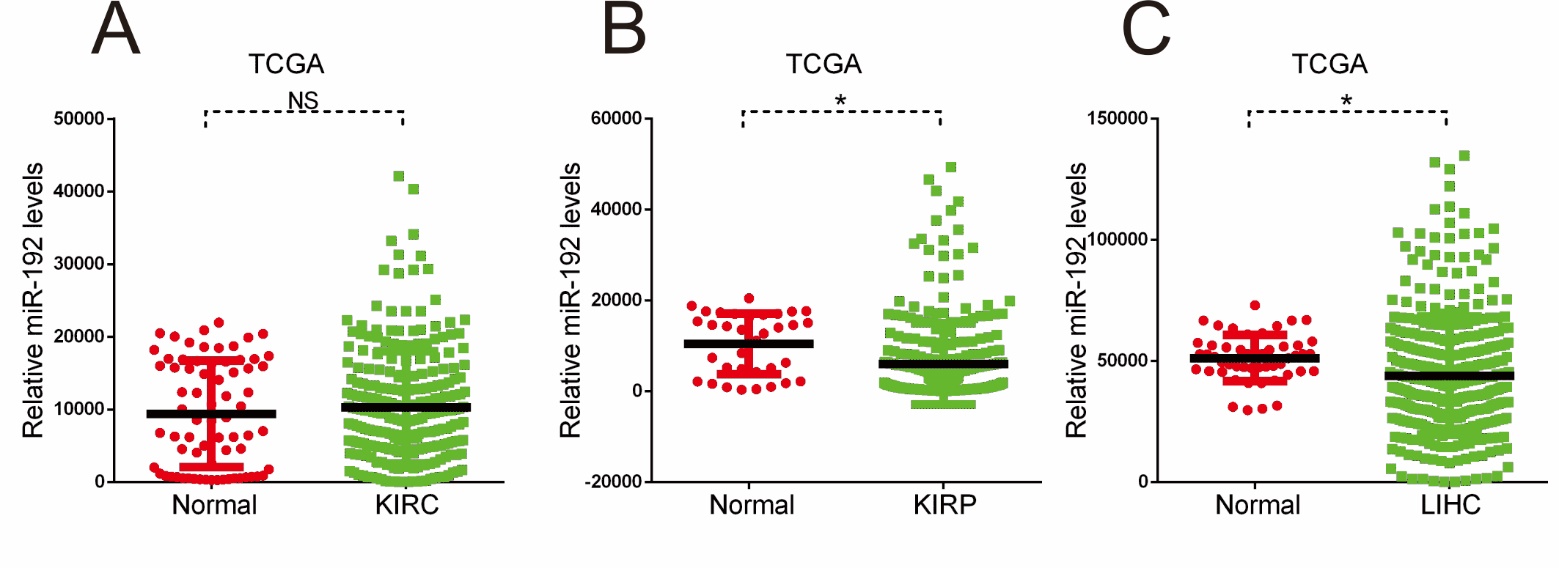


**Supplementary Figure 1.** Analysis of TCGA datasets, for the expression of miR-192-5p in KIRC(A), in KIRP(B), in LIHC(C). (*, *p* < 0.05).
